# Supplementary material for: Clinical Significance of a Circulating Tumor Cell-based Classifier in Stage IB Lung Adenocarcinoma: A Multicenter, Cohort Study
Source: PubMed Central journal article supplement (PMC9831033; doi:10.1097/sla.0000000000004780), 2023-01-10
Supplement: sla-277-e439-s001.pdf [file sla-277-e439-s001.pdf]

1 **Supplementary data:**  
 2 Supplementary Tables: 4  
 3 Supplementary Figures: 9

4  
 5  
 6

**Supplementary Table S1. Establishment of CTC Cutoff Value in Training Cohort**

| CTC cutoff | Group* | No. in each group | 36-Month PFS (%) | Survival difference (%) | HR   | 95%CI     | P      |
|------------|--------|-------------------|------------------|-------------------------|------|-----------|--------|
| 1          | 0      | 3                 | 100.0            | 52.2                    | 1.7  | 0.4-7.1   | 0.4700 |
|            | ≥ 1    | 67                | 47.8             |                         |      |           |        |
| 2          | 0-1    | 21                | 85.7             | 51.0                    | 2.2  | 1.1-4.4   | 0.0210 |
|            | ≥ 2    | 49                | 34.7             |                         |      |           |        |
| 3          | 0-2    | 30                | 80.0             | 52.5                    | 4.7  | 2.1-11.0  | 0.0002 |
|            | ≥ 3    | 40                | 27.5             |                         |      |           |        |
| 4          | 0-3    | 45                | 73.3             | 65.3                    | 5.1  | 2.4-11.0  | .0000  |
|            | ≥ 4    | 25                | 8.0              |                         |      |           |        |
| 5          | 0-4    | 56                | 60.7             | 53.6                    | 5.1  | 2.1-12.0  | 0.0003 |
|            | ≥ 5    | 14                | 7.1              |                         |      |           |        |
| 6          | 0-5    | 62                | 56.5             | -                       | 6.1  | 1.8-20.0  | 0.0032 |
|            | ≥ 6    | 8                 | -                |                         |      |           |        |
| 7          | 0-6    | 64                | 54.7             | -                       | 11.0 | 3.2-39.0  | 0.0002 |
|            | ≥ 7    | 6                 | -                |                         |      |           |        |
| 8          | 0-7    | 67                | 52.2             | -                       | 13.0 | 2.5-65.0  | 0.0023 |
|            | ≥ 8    | 3                 | -                |                         |      |           |        |
| 9          | 0-8    | 67                | 52.2             | -                       | 13.0 | 2.5-65.0  | 0.0023 |
|            | ≥ 9    | 3                 | -                |                         |      |           |        |
| 10         | 0-9    | 69                | 50.7             | -                       | 42.0 | 3.7-480.0 | 0.0025 |
|            | ≥ 10   | 1                 | -                |                         |      |           |        |

7 \*Split into below and above different CTC cutoffs in rows.  
 8 P indicates significance according to Cox proportional hazards regression.  
 9 CTC indicates circulating tumor cell; HR, hazard ratio; PFS, progression-free survival; CI,  
 10 confidence interval.

11  
 12  
 13  
 14  
 15  
 16  
 17  
 18  
 19  
 20

21

22

**Supplementary Table S2. Establishment of CTC Cutoff Value in Training Cohort**

23

| CTC cutoff | Group | No. in each group | 36-Month OS (%) | Survival difference (%) | HR   | 95%CI     | <i>P</i> |
|------------|-------|-------------------|-----------------|-------------------------|------|-----------|----------|
| 1          | 0     | 3                 | 100.0           | 28.4                    | 4.9  | 0.7-36.0  | 0.1200   |
|            | ≥ 1   | 67                | 71.6            |                         |      |           |          |
| 2          | 0-1   | 21                | 100             | 38.8                    | 5.0  | 2.3-11.0  | .0000    |
|            | ≥ 2   | 49                | 61.2            |                         |      |           |          |
| 3          | 0-2   | 30                | 96.7            | 41.7                    | 8.7  | 4.0-19.0  | .0000    |
|            | ≥ 3   | 40                | 55.0            |                         |      |           |          |
| 4          | 0-3   | 45                | 97.8            | 69.8                    | 10.0 | 4.6-23.0  | .0000    |
|            | ≥ 4   | 25                | 28.0            |                         |      |           |          |
| 5          | 0-4   | 56                | 83.9            | 60.7                    | 8.2  | 3.4-20.0  | .0000    |
|            | ≥ 5   | 14                | 28.6            |                         |      |           |          |
| 6          | 0-5   | 62                | 80.6            | 68.1                    | 10.0 | 3.9-28.0  | .0000    |
|            | ≥ 6   | 8                 | 12.5            |                         |      |           |          |
| 7          | 0-6   | 64                | 78.1            | 61.4                    | 9.6  | 3.5-27.0  | .0000    |
|            | ≥ 7   | 6                 | 16.7            |                         |      |           |          |
| 8          | 0-7   | 67                | 76.1            | -                       | 47.0 | 7.5-290.0 | .0000    |
|            | ≥ 8   | 3                 | -               |                         |      |           |          |
| 9          | 0-8   | 67                | 76.1            | -                       | 47.0 | 7.5-290.0 | .0000    |
|            | ≥ 9   | 3                 | -               |                         |      |           |          |
| 10         | 0-9   | 69                | 73.9            | -                       | 22.0 | 2.3-220.0 | 0.0070   |
|            | ≥ 10  | 1                 | -               |                         |      |           |          |

24 \*Split into below and above different CTC cutoffs in rows.

25 *P* indicates significance according to Cox proportional hazards regression.26 CTC indicates circulating tumor cell; HR, hazard ratio; OS, overall survival; CI, confidence  
27 interval.

28

29

30

31

32

33

34

35

36

37

38

39

40

41 **Supplementary Table S3. The Associations Between Different CTC Levels and**  
 42 **Clinicopathological Characteristics in 212 Stage IB LUAD Patients**

| Characteristic         | Patients with CTCs (%) |        |        |        |        |       |       |       |
|------------------------|------------------------|--------|--------|--------|--------|-------|-------|-------|
|                        | ≥1                     | ≥2     | ≥3     | ≥4     | ≥5     | ≥6    | ≥7    | ≥10   |
| All (n=212)            | 94.3                   | 89.6   | 56.6   | 41.5   | 20.8   | 10.4  | 7.5   | 1.4   |
| <b>Sex</b>             |                        |        |        |        |        |       |       |       |
| Male                   | 94.5                   | 76.1   | 56.0   | 39.4   | 22.9   | 14.7  | 11.0  | 1.8   |
| Female                 | 94.2                   | 74.8   | 57.3   | 41.7   | 18.4   | 5.8   | 3.9   | 1.0   |
| <i>P</i>               | 1                      | 0.874  | 0.890  | 1      | 0.499  | 0.043 | 0.068 | 1     |
| <b>Age (years)</b>     |                        |        |        |        |        |       |       |       |
| <60                    | 90.9                   | 63.6   | 42.7   | 30.0   | 10.9   | 3.6   | 2.7   | 0.0   |
| ≥60                    | 98.0                   | 88.2   | 71.6   | 53.9   | 31.4   | 17.6  | 12.7  | 2.9   |
| <i>P</i>               | 0.035                  | <0.001 | <0.001 | <0.001 | <0.001 | 0.001 | 0.008 | 0.110 |
| <b>Smoke</b>           |                        |        |        |        |        |       |       |       |
| Yes                    | 95.0                   | 82.5   | 55.0   | 42.5   | 27.5   | 12.5  | 10.0  | 5.0   |
| No                     | 93.9                   | 72.7   | 56.4   | 41.8   | 18.8   | 9.7   | 6.7   | 0.6   |
| <i>P</i>               | 1                      | 0.230  | 1      | 1      | 0.274  | 0.569 | 0.499 | 0.098 |
| <b>Differentiation</b> |                        |        |        |        |        |       |       |       |
| Poorly                 | 100.0                  | 83.3   | 50.0   | 33.3   | 8.3    | 0.0   | 0.0   | 0.0   |
| Moderately             | 94.0                   | 75.4   | 56.9   | 41.3   | 22.2   | 12.0  | 8.4   | 1.8   |
| Well                   | 93.9                   | 72.7   | 57.6   | 45.5   | 18.2   | 6.1   | 6.1   | 0.0   |
| <i>P</i>               | <0.01                  | <0.01  | <0.01  | <0.01  | <0.01  | <0.01 | <0.01 | 0.333 |
| <b>Tumor size (cm)</b> |                        |        |        |        |        |       |       |       |
| <3.5                   | 93.9                   | 73.5   | 56.4   | 40.9   | 21.0   | 11.0  | 7.7   | 1.7   |
| ≥3.5                   | 96.8                   | 87.1   | 58.1   | 45.2   | 19.4   | 6.5   | 6.5   | 0.0   |
| <i>P</i>               | 1                      | 0.539  | 0.859  | 0.655  | 0.835  | 0.749 | 1     | 0.097 |

43 *P* indicates significance according to Chi-square test or Fisher's exact test.

44 CTC indicates circulating tumor cell; LUAD, lung adenocarcinoma.

45  
 46  
 47  
 48  
 49  
 50  
 51  
 52  
 53  
 54  
 55  
 56  
 57  
 58

59 **Supplementary Table S4: The C-Index of the Five Enrolled Factors in the Nomogram in**  
60 **the SYSUFH Training Cohort**

61

| <b>Factors</b>  | <b>C-index</b> | <b>95% CI</b> | <b><i>P</i></b> |
|-----------------|----------------|---------------|-----------------|
| Sex             | 0.507          | 0.423-0.590   | 0.883           |
| Age             | 0.682          | 0.606-0.759   | < .001          |
| Smoke           | 0.536          | 0.472-0.600   | 0.274           |
| Differentiation | 0.530          | 0.464-0.560   | 0.374           |
| CTC             | 0.708          | 0.685-0.785   | < .001          |

62

63 *P* indicates significance according to Cox proportional hazards regression

64 C-index indicates concordance index; CI, confidence interval; CTC, circulating tumor cell;  
65 SYSUFH, The First Affiliated Hospital of Sun Yat-sen University.

66

67

68

69

70

71

72

73

74

75

76

77

78

79

80

81

82

83

84

85

86

87

88

89

90

91

92

93

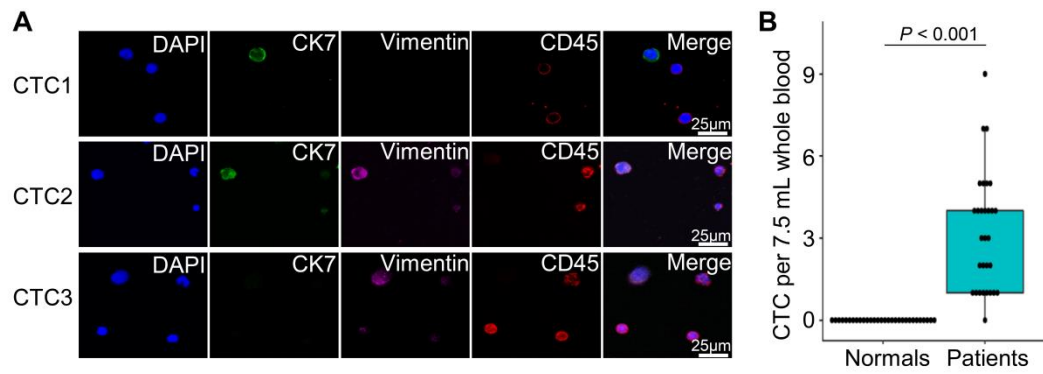

94

95 **Supplementary Figure S1: Gallery of CTC images from the aptamer-modified**

96 **NanoVelcro system obtained from 7.5 mL of blood from 30 healthy donors and 30 stage**

97 **IB LUAD patients.** A, CTC1 shows that epithelial CTCs express CK7. CTC2 shows that hybrid

98 CTCs express CK7 and Vimentin. CTC3 shows that mesenchymal CTCs express Vimentin. B,

99 CTC number in 7.5 mL of peripheral blood from stage IB LUAD patients was significantly

100 higher than that in healthy controls ( $P < 0.001$ ). CTC indicates circulating tumor cell; LUAD, lung

101 adenocarcinoma.

102

103

104

105

106

107

108

109

110

111

112

113

114

115

116

117

118

119

120

121

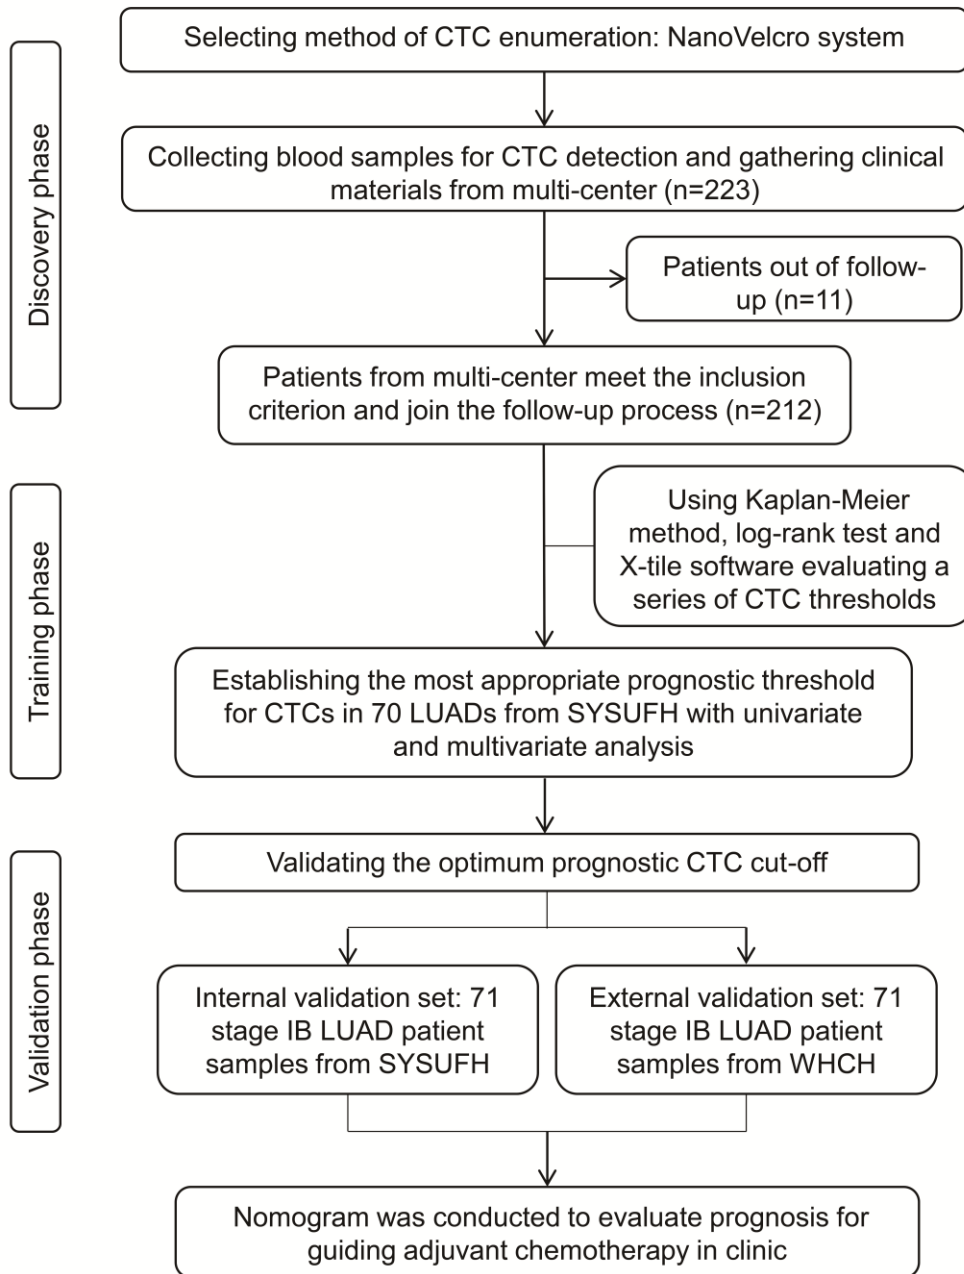

122

123 **Supplementary Figure S2: Study flowchart of the development and evaluation of the**

124 **CTC-based classifier in stratifying the risk of stage IB LUAD.** CTC indicates circulating

125 tumor cell; LUAD, lung adenocarcinoma; SYSUFH, First Affiliated Hospital of Sun Yat-sen

126 University; WHCH, Wuhan Central Hospital.

127

128

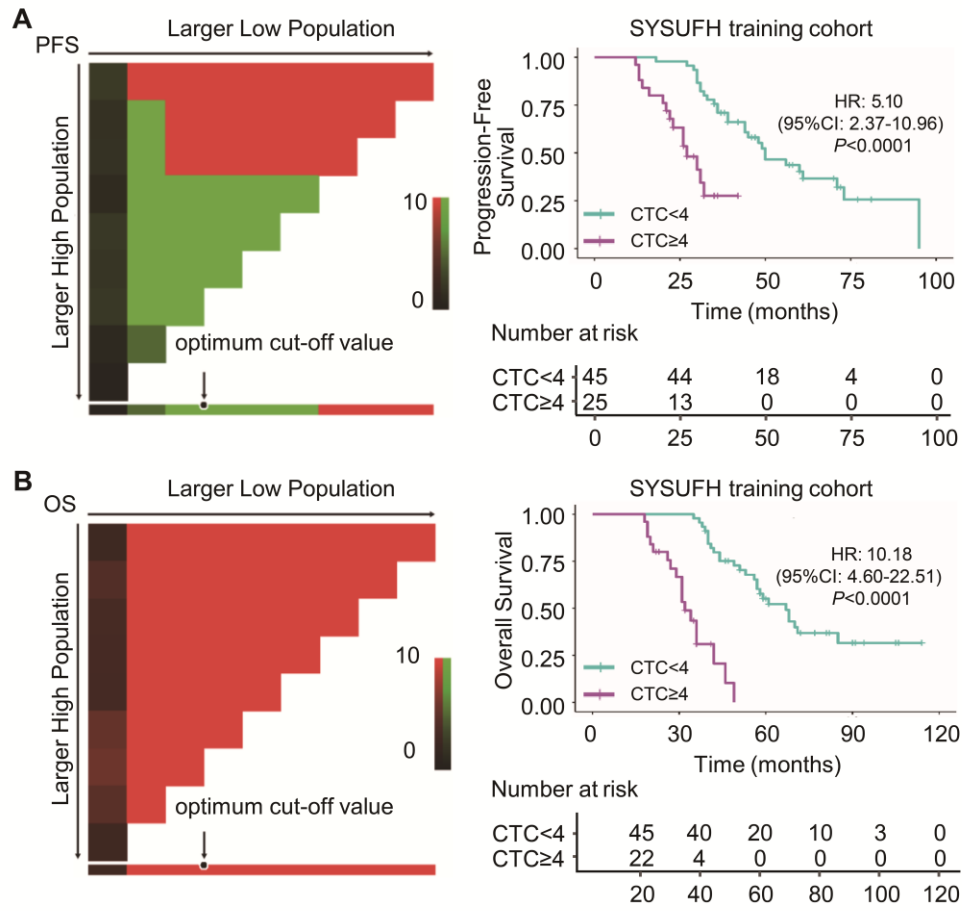

129

130 **Supplementary Figure S3: The optimum cutoff value of CTC count and Kaplan-Meier**

131 **curves for predicting PFS and OS in the training cohort with 70 stage IB LUAD patients.**

132 A, Progression-free survival; B, Overall survival. The optimum cutoff value was defined using

133 the X-tile program, and the coloration of the plot represents the strength of the association at

134 each division. Red represents a positive association between the risk score and PFS or OS,

135 whereas green represents an inverse association. CTC indicates circulating tumor cell; PFS,

136 progression-free survival; OS, overall survival; HR, hazard ratio.

137

138

139

140

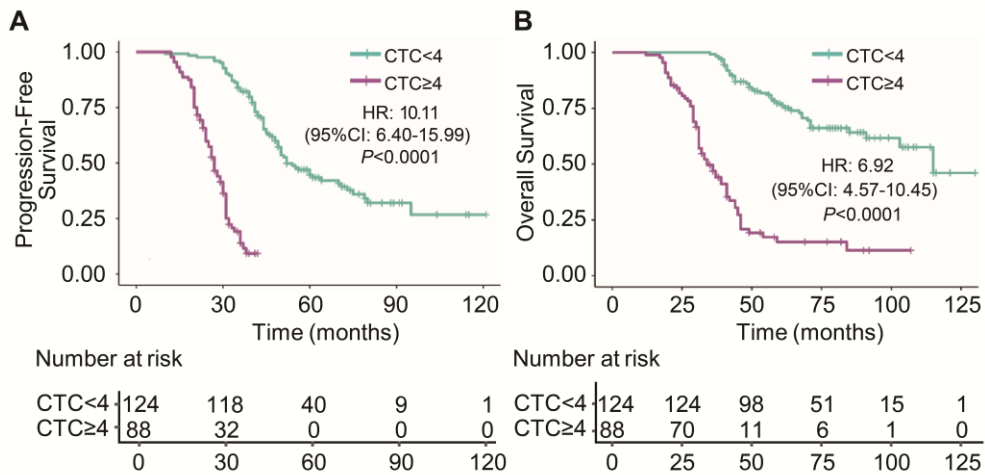

141

142 **Supplementary Figure S4. Kaplan-Meier curves for predicting PFS and OS according to**

143 **the cutoff value of 4 CTCs per 7.5 mL of blood in all 212 patients with stage IB LUAD. A,**

144 **Progression-free survival according to the number of CTCs detected in the total patient cohort;**

145 **B, Overall survival according to the number of CTCs detected in the total patient cohort. *P***

146 **indicates significance according to log Rank test. CTC indicates circulating tumor cell; PFS,**

147 **progression-free survival; OS, overall survival; HR, hazard ratio.**

148

149

150

151

152

153

154

155

156

157



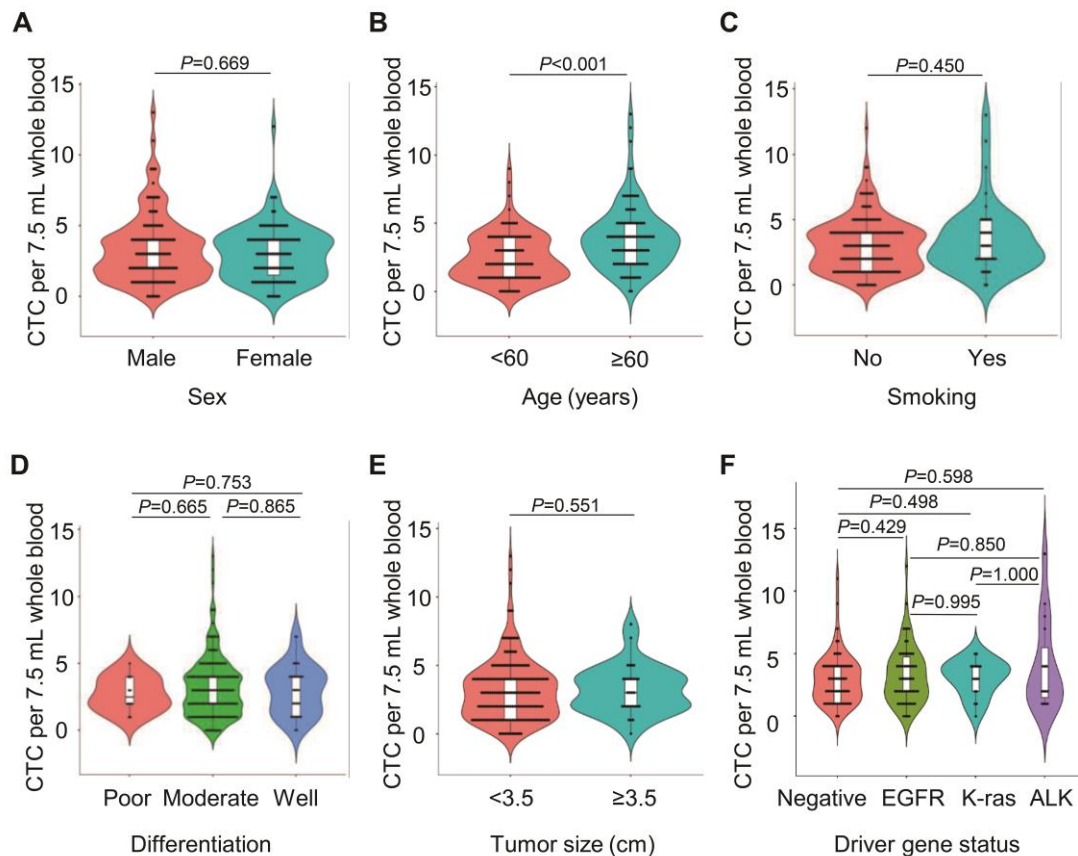

158

159 **Supplementary Figure S5. Relationship between total CTC number and different**

160 **clinicopathological characteristics.** A, Prevalence of CTCs in 7.5 mL of blood in sex: male

161 (n = 109) and female (n = 103). B, Prevalence of CTCs in 7.5 mL of blood in age (years): <60

162 (n = 110) and ≥ 60 (n = 102). C, Prevalence of CTCs in 7.5 mL of blood in status of smoking: no

163 (n = 165) and yes (n = 40). D, Prevalence of CTCs in 7.5 mL of blood in different differentiation:

164 poor (n = 12), moderate (n = 167) and well (n = 33). E, Prevalence of CTCs in 7.5 mL of blood

165 in different tumor size: < 3.5 cm (n = 181) and ≥ 3.5 cm (n = 31). F, Prevalence of CTCs in 7.5

166 mL of blood from different driver gene groups: negative (n = 65), EGFR mutation (n = 62), K-ras

167 mutation (n = 17), ALK rearrangement (n = 15). Other 53 patients have no gene testing reports.

168 CTC indicates circulating tumor cell.

169

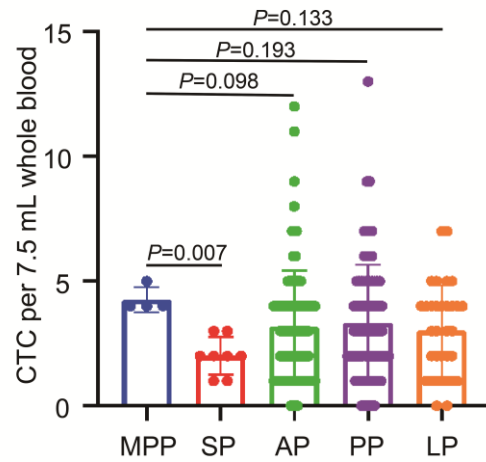

170

171 **Supplementary Figure S6. Prevalence of CTCs in 7.5 mL of blood from different**

172 **histologic subtypes of LUAD. MPP (n = 4), SP (n = 8), AP (n = 88), PP (n = 79), LP (n = 33).**

173 n indicates the number of patients in each group. CTC indicates circulating tumor cell; MPP,

174 Micropapillary predominant; SP, solid predominant; AP, acinar predominant; PP, papillary

175 predominant; LP, Lepidic predominant.

176

177

178

179

180

181

182

183

184

185

186

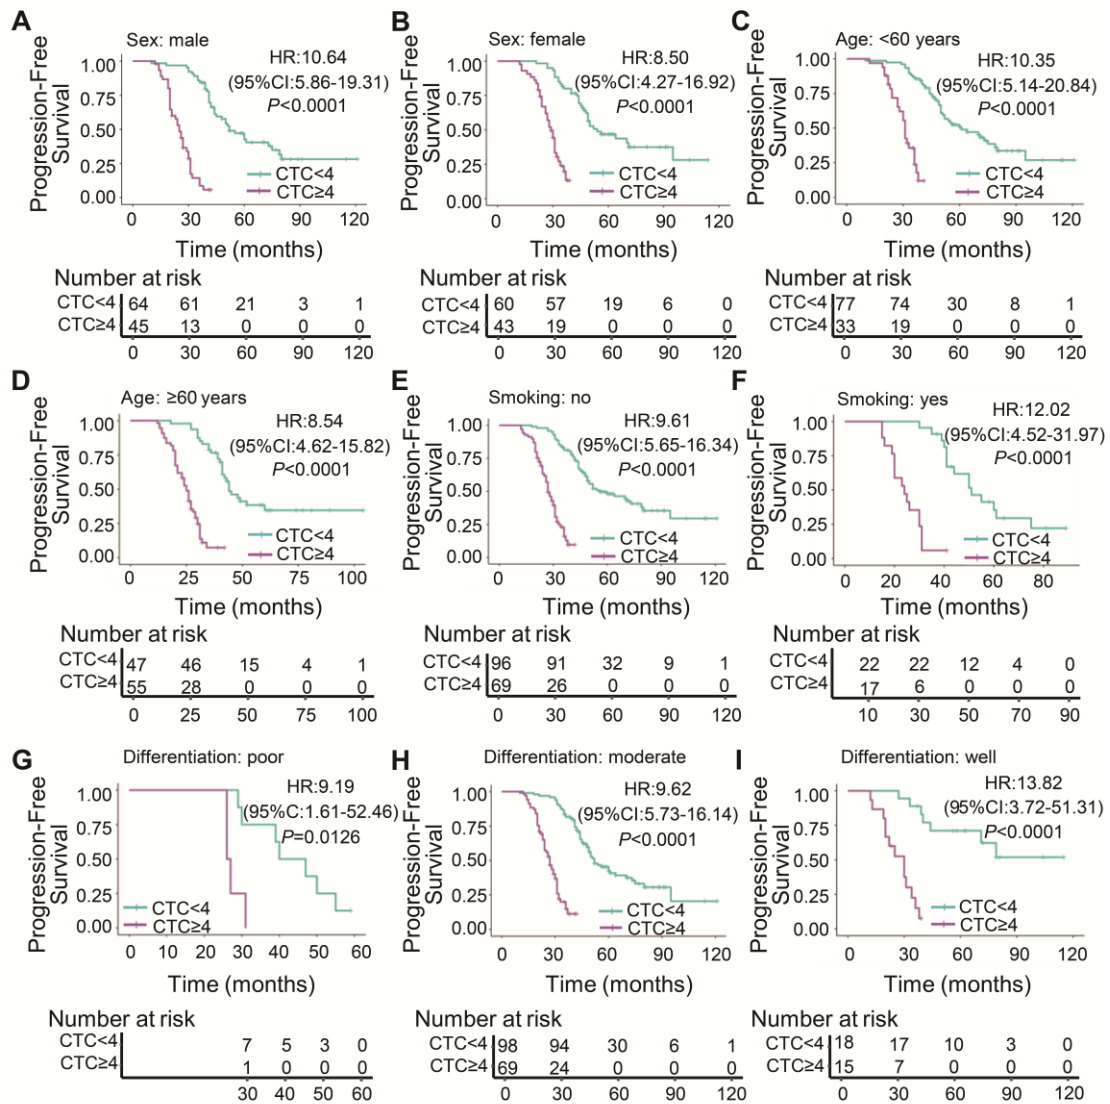

187

188 **Supplementary Figure S7. Kaplan-Meier curves for predicting PFS with different**

189 **clinicopathological characteristics according to the cutoff value of 4 CTCs per 7.5 mL of**

190 **blood in all 212 patients. A, male with CTC<4 or CTC≥4 groups; B, female with CTC<4 or**

191 **CTC≥4 groups; C, age<60 with CTC<4 or CTC≥4 groups; D, age≥60 with CTC<4 or CTC≥4**

192 **groups; E, smoking with CTC<4 or CTC≥4 groups; F, no smoking with CTC<4 or CTC≥4**

193 **groups; G, poor differentiation with CTC<4 or CTC≥4 groups; H, moderate differentiation with**

194 **CTC<4 or CTC≥4 groups; I, well differentiation with CTC<4 or CTC≥4 groups. *P* indicates**

195 significance according to log Rank test. CTC indicates circulating tumor cell; PFS,  
 196 progression-free survival; HR, hazard ratio.

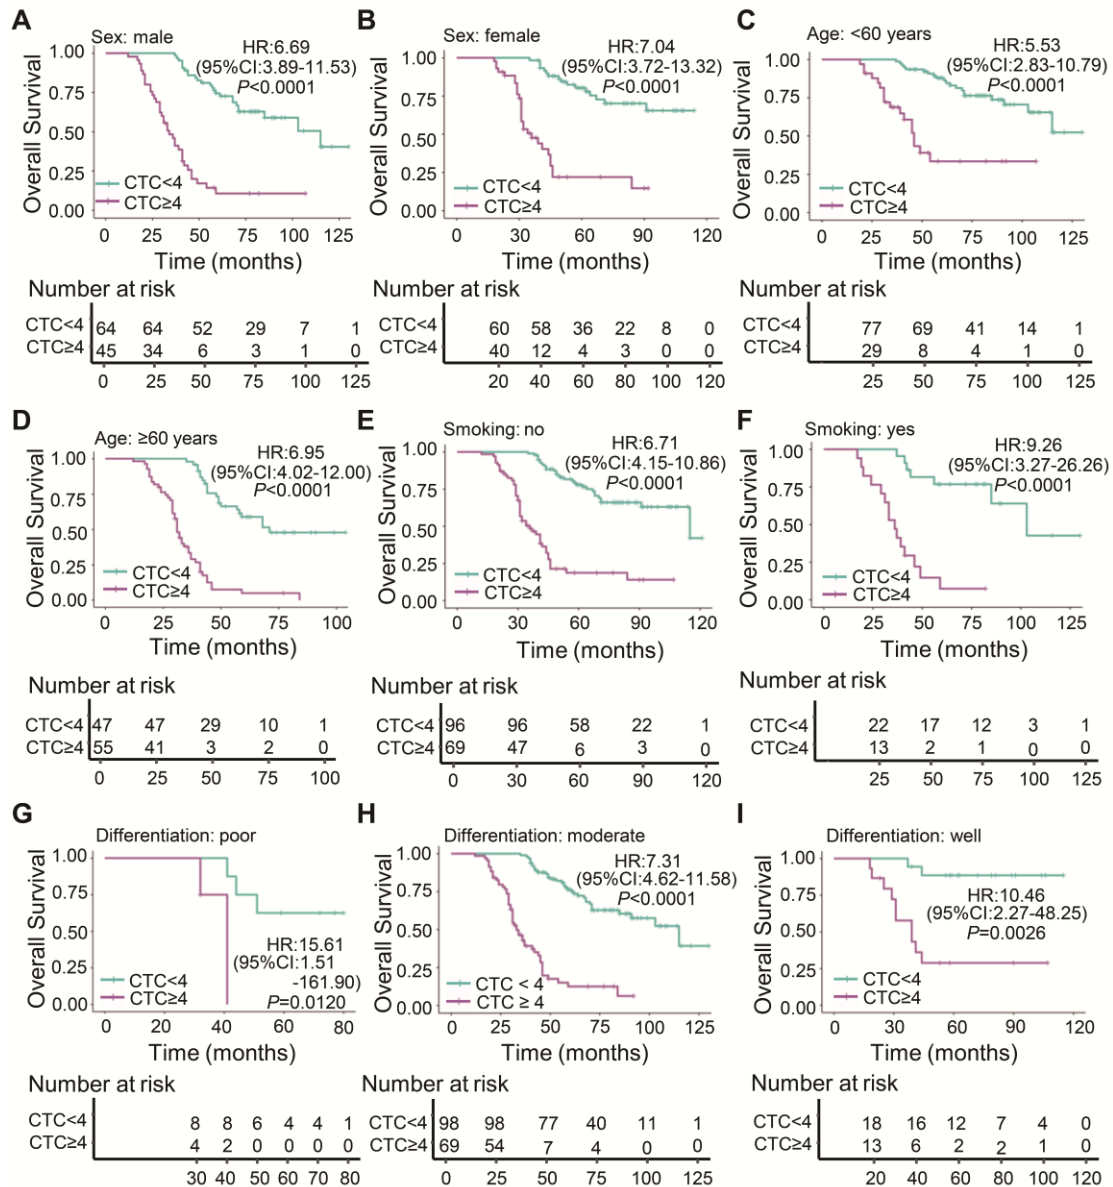

197

198 **Supplementary Figure S8. Kaplan-Meier curves for predicting OS with different**

199 **clinicopathological characteristics according to the cutoff value of 4 CTCs per 7.5 mL of**

200 **blood in all 212 patients. A, male with CTC<4 or CTC≥4 groups; B, female with CTC<4 or**

201 **CTC≥4 groups; C, age<60 with CTC<4 or CTC≥4 groups; D, age≥60 with CTC<4 or CTC≥4**

202 **groups; E, smoking with CTC<4 or CTC≥4 groups; F, no smoking with CTC<4 or CTC≥4**

203 groups; G, poor differentiation with CTC<4 or CTC≥4 groups; H, moderate differentiation with  
 204 CTC<4 or CTC≥4 groups; I, well differentiation with CTC<4 or CTC≥4 groups. CTC indicates  
 205 circulating tumor cell; OS, overall survival; HR, hazard ratio.  
 206

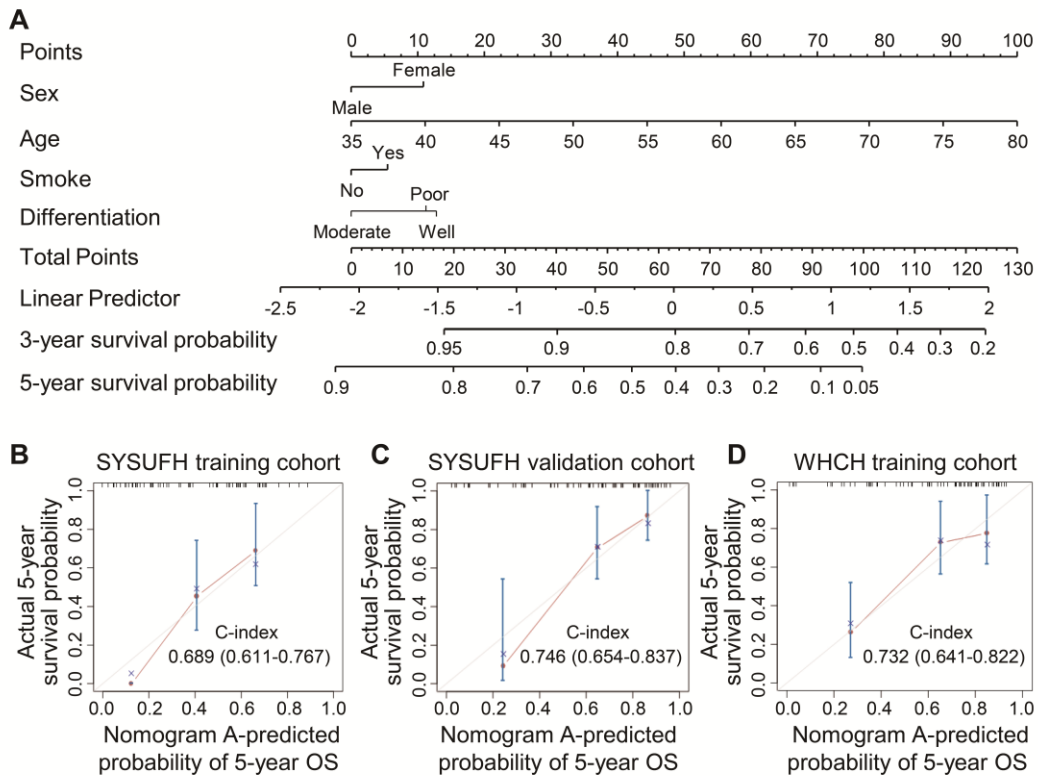

207  
 208 **Supplementary Figure S9: Nomogram A (excluding CTC level) for predicting the 3- and**  
 209 **5-year survival probabilities of patients with stage IB LUAD and calibration curves for**  
 210 **testing the stability of nomogram.** A, Nomogram A was based on the multivariate analysis  
 211 results of the SYSUFH training cohort. B, Calibration curves of the SYSUFH training cohort. C,  
 212 Calibration curves of the SYSUFH validation cohort. D, Calibration curves of the WHCH  
 213 validation cohort. CTC indicates circulating tumor cell; C-index, concordance index; SYSUFH,  
 214 First Affiliated Hospital of Sun Yat-sen University; WHCH, Wuhan Central Hospital; LUAD,  
 215 lung adenocarcinoma.
